# Supplementary material
Source: Frontiers journal article supplement (https://www.frontiersin.org/articles/419274)
Supplement: Table_1.DOCX [file Table_1.DOCX]

Fine-scale tracking of ambient temperature and movement reveals shuttling behaviour of elephants to water

**Maria Thaker1,2*, Pratik R. Gupte1,3,4,5, Herbert H. T. Prins6, Rob Slotow2,7, Abi T. Vanak2,3,8**

1Centre for Ecological Sciences, Indian Institute of Science, Bangalore, India

2School of Life Sciences, University of Kwazulu-Natal, Pietermaritzburg, South Africa

3Ashoka Trust for Research in Ecology and the Environment, Bangalore, India

4Groningen Institute for Evolutionary Life Sciences, University of Groningen, Groningen, The Netherlands

5Department of Coastal Systems, Royal Netherlands Institute for Sea Research, Texel, The Netherlands

6Resource Ecology Group, Wageningen University, The Netherlands

7Department of Genetics, Evolution and Environment, University College, London, UK

8Wellcome Trust/DBT India Alliance Fellow, Hyderabad, India

*** Correspondence:**Maria Thaker
mthaker@iisc.ac.in

M. Thaker and P.R. Gupte are co-first authors

**Keywords: *Loxodonta africana*, thermoregulation, GPS telemetry, temperature, water, habitat, shuttle.**

**Abstract**

Movement strategies of animals have been well studied as a function of ecological drivers (e.g., forage selection and avoiding predation) rather than physiological requirements (e.g., thermoregulation). Thermal stress is a major concern for large mammals, especially for savanna elephants *(Loxodonta africana),* which have amongst the greatest challenge for heat dissipation in hot and arid environments.Therefore, elephants must make decisions about where and how fast to move to reduce thermal stress. We tracked 14 herds of elephant in Kruger National Park (KNP), South Africa, for 2 years, using GPS collars with inbuilt temperature sensors to examine the influence of temperature on movement strategies, particularly when accessing water. We first confirmed that collar-mounted temperature loggers captured hourly variation in relative ambient temperatures across the landscape, and thus, could be used to predict elephant movement strategies at fine spatio-temporal scales. We found that elephants moved slower in more densely wooded areas, but unexpectedly, moved faster at higher temperatures, especially in the wet season compared to the dry season. Notably, this speed of movement was highest when elephants were approaching and leaving water sources. Visits to water showed a periodic shuttling pattern, with a peak return rate of 10-30 hours, wherein elephants were closest to water during the hotter times of the day, and spent longer at water sources in the dry season compared to the wet season. When elephants left water, they showed low fidelity to the same water source, and travelled farther in the dry season than in the wet season. In KNP, where water is easily accessible, and the risk of poaching is low, we found that elephants use short, high-speed bursts of movement to get to water at hotter times of day. This strategy not only provides the benefit of predation risk avoidance, but also allows them to use water to thermoregulate. We demonstrate that ambient temperature is an important predictor of movement and water use across the landscape, with elephants responding facultatively to a “landscape of thermal stress”.

# Introduction

Ranging behaviour of mammals is influenced by an optimization of multiple ecological drivers, from maximizing resource acquisition and habitat selection [(Fortin *et al.* 2003; Bastille-Rousseau *et al.* 2018)](https://www.zotero.org/google-docs/?DyGMY8), to minimizing predation risk and competition [(Valeix *et al.* 2009b; Thaker *et al.* 2011; Vanak *et al.* 2013)](https://www.zotero.org/google-docs/?IARhaY). We have a strong understanding of movement strategies based on the ecology of animals, but the importance of animal physiology in driving movements is becoming increasingly apparent. For example, the energetics of movement strongly influence how terrestrial carnivores use terrain and other habitat features during hunting [(Williams *et al.* 2014; Scantlebury *et al.* 2014; Bryce *et al.* 2017)](https://www.zotero.org/google-docs/?19oqbo). Similarly, the intensity of locomotion (number of strokes) of Weddell seals *(Leptonychotes weddellii)* directly affects post-dive oxygen consumption [(Williams 2004)](https://www.zotero.org/google-docs/?Px4KAV). In ungulates, adaptation to temperature fluctuations influence activity patterns [(Hetem *et al.* 2011; Shrestha *et al.* 2012)](https://www.zotero.org/google-docs/?5BNTlI) and in savanna elephants (*Loxodonta africana*), chronic stress can restrict the home-ranges of herds and increase use of refugia [(Jachowski *et al.* 2012, 2013; Wato *et al.* 2016)](https://www.zotero.org/google-docs/?zn8JDm). With advances in animal telemetry allowing for the incorporation of a range of sensors [(Kays *et al.* 2015)](https://www.zotero.org/google-docs/?0ylLrp), and the rapidly developing field of movement ecology [(Nathan *et al.* 2008)](https://www.zotero.org/google-docs/?fZJ1u2), we now have an opportunity to understand movement strategies not only as an outcome of balancing ecological drivers, but as a function of physiological requirements and constraints.

One of the strongest drivers of how animals use their environment is ambient temperature [(Shrestha *et al.* 2014; Mitchell *et al.* 2018)](https://www.zotero.org/google-docs/?0AWIpT). Animals respond to environmental temperature by thermoregulating with physiological adaptations and behavioural strategies [(Angilletta 2012)](https://www.zotero.org/google-docs/?fMH1a3). Most desert dwelling mammals have multiple physiological adaptations to reduce water loss [(Cain *et al.* 2006; Fuller *et al.* 2014)](https://www.zotero.org/google-docs/?nnuqoc), but they also shift their activity peaks to cooler times of the day or are nocturnal [(Walsberg 2000; Aublet *et al.* 2009)](https://www.zotero.org/google-docs/?uH9xC6). Occupying habitats or using environmental features that either promote heat loss, such as water sources, or reduce heat gain, such as shade under dense vegetation, constitutes an important class of behavioural responses to heat stress. For example, moose *(Alces alces)* seek refuge from high temperatures in shady coniferous forest in summer [(van Beest *et al.* 2012)](https://www.zotero.org/google-docs/?3OSBUm), and Arabian oryx *(Oryx leucoryx)* select for covered sites during the hottest part of the day [(Hetem *et al.* 2012)](https://www.zotero.org/google-docs/?YKDfsC). Some landscape features, such as water sources, may promote both behavioural and physiological thermoregulation. Replenishment of body water reserves staves off dehydration, and also makes evaporative cooling a viable thermoregulatory strategy [(Dunkin *et al.* 2013)](https://www.zotero.org/google-docs/?BWC0DW). Hence, large herbivores such as Cape buffalo *(Syncerus caffer)* and savanna elephant both wallow as well as drink at water sources to cool down [(Prins 1996; Bennitt *et al.* 2014; Purdon 2015)](https://www.zotero.org/google-docs/?eO2CIw).

When water sources are limited, mammals must balance the thermoregulatory benefits against the costs of increased predation and competition [(Valeix *et al.* 2009b; Cain *et al.* 2012; Chamaillé-Jammes *et al.* 2013; Owen-Smith and Goodall 2014)](https://www.zotero.org/google-docs/?h3NiJ9). Individuals may attempt to avoid such costs by shuttling, i.e., moving frequently between water and safer sites, but this movement increases travel costs and decreases time that could have been spent foraging or resting [(Johnson *et al.* 2002; Cain *et al.* 2012; Chamaillé-Jammes *et al.* 2013; Giotto *et al.* 2015)](https://www.zotero.org/google-docs/?jIB6OO). Water-dependence can introduce periodicity to movement strategies in the short term, and may further result in strong fidelity to known water sources [(Giotto *et al.* 2015)](https://www.zotero.org/google-docs/?nZ6U3m). Long term seasonal differences in the distribution and accessibility of water can also influence movement strategies; for example, buffalo in the Okavango delta are closer to permanent water sources in the dry season, when ephemeral sources dry up and water availability across the landscape is reduced [(Bennitt *et al.* 2014)](https://www.zotero.org/google-docs/?WpaIht). Thus, for mammals living in hot arid and semi-arid areas, temperature is the underlying environmental driver that dictates when and how frequently they access water.

Here we investigate how ambient temperature drives the ranging behaviour of the largest land mammal, the savanna elephant. The large size of the elephant makes heat dissipation a greater challenge than heat retention [(Wright and Luck 1984; Williams 1990)](https://www.zotero.org/google-docs/?qsUIK6). In response, elephants use a range of thermoregulatory strategies, involving both physiological and behavioural mechanisms of losing heat [(Buss and Estes 1971; Wright and Luck 1984; Myhrvold *et al.* 2012; Dunkin *et al.* 2013; Mole *et al.* 2016)](https://www.zotero.org/google-docs/?yID57c). For example, elephants seek shade [(Kinahan *et al.* 2007b)](https://www.zotero.org/google-docs/?nosT5k), lose heat via the trunk [(Williams 1990)](https://www.zotero.org/google-docs/?gGWfc3), and flap their ears [(Hiley 1975; Wright 1984; Wright and Luck 1984)](https://www.zotero.org/google-docs/?EQqFzS), as non-evaporative cooling strategies. At larger spatio-temporal scales, elephants avoid thermal stress by shifting their activity peaks to cooler times of the day, and selecting for thermally stable landscapes with lower variation in daily temperatures [(Kinahan *et al.* 2007a)](https://www.zotero.org/google-docs/?7BASqP). Elephants are also heavily water dependent, and make periodic visits to water to hydrate, as well as to use evaporative cooling to thermoregulate (Dunkin *et al.* 2013; Valls-Fox 2015). Thus, at the landscape scale, environmental temperature and the distribution of accessible water are expected to be important drivers of elephant movement strategies [(Purdon and van Aarde 2017; Wato et al. 2018)](https://www.zotero.org/google-docs/?9jTAns). Yet, there has been little work to understand the role of thermoregulation on the dynamic landscape-scale movement decisions of elephants [(Dunkin *et al.* 2013)](https://www.zotero.org/google-docs/?tRPgxK). Although other studies have examined the effect of temperature on animal movement, this key environmental predictor is typically derived from global environmental datasets, such as BIOCLIM [(Guralnick, 2006)](https://www.zotero.org/google-docs/?SO7n6C), remotely sensed satellite data (Purdon and van Aarde 2017), or weather station data (Purdon and van Aarde 2017). Such data, however, are either temporally or spatially mismatched to the scale of animal movement. Here, we use high-resolution position data from GPS telemetry, coupled with instantaneous data from temperature loggers on GPS collars, to track both elephant movement and variation in ambient temperature across the heterogeneous savanna landscape. We first establish that collar temperature is well predicted by ambient temperature, and thus can be used as a fine-scaled measure of variation in the thermal landscape. This approach allows us to test the hypothesis that relative differences in ambient temperature are an important driver of movement strategies of elephants in Kruger National Park, South Africa. We then closely examine movement behavior in relation to water visits, focusing in particular on the distance travelled and movement rates as elephants approach and leave water sources. With dynamic tracking of the variable thermal landscape and movements at fine spatio-temporal scales, we show how water dependency in wild savanna elephants is dictated by environment temperature.

# Methods

## Elephant tracking data

The study was conducted in the central and southern part of Kruger National Park (extent: 31.1 ºE – 32.0 ºE, 23.9 ºS – 25.4 ºS) in South Africa, where 14 female African elephants, each from a different herd, were fitted with GPS logger collars (African Wildlife Tracking, Fig. 1) set to record a location every half hour. Details of the capture and collaring of these elephants can be found in [Birkett *et al.* 2012](https://www.zotero.org/google-docs/?48QNpS). Collars on elephants had inbuilt temperature loggers that were mounted on the GPS chipset, and the entire electronic unit was embedded in dental acrylic. The temperature recorded by the collar-mounted sensor is a combination of ambient, circuit-generated and elephant body temperature (African Wildlife Tracking, *pers. comm.*). For this study, we used location and temperature data from 14 collared elephants over 731 days between August 2007 and August 2009. We classified the data from the study period into the dry and wet seasons based on actual rainfall data during those years (as per Birkett *et al.* 2012). Each elephant was tracked for an average of 562 days (SD = 175; range = 260 – 723) over the study period. We obtained 283,737 GPS positions in total from 14 elephants, with roughly equal points in the dry (n = 138,764) and wet seasons (n = 144,973).

## Landscape data

We obtained the following landscape-level data for the study area: (1) percent woody cover, extracted from [(Bucini et al., 2010](https://www.zotero.org/google-docs/?xgbIGF)), (2) map (line shapefiles) of all waterways logged on OpenStreetMap (n = 939), and (3) locations of active park waterholes (n = 124, South African National Parks). Waterways in the study area included perennial and seasonal rivers (nperennial = 72, nseasonal = 11), streams (nseasonal = 460, nperennial = 363), and one canal. Seasonal rivers and streams were only included in the calculations for the wet season, when we expected them to have water. Waterholes in the study area were of different types and included boreholes (n = 74), concrete dams (n = 8), concrete weir dams (n = 5), earthen dams (n = 30), and pipeline troughs (n = 7). All open waterholes were included in the distance to water calculations in each season. Waterholes were on average 4 km (SD = 3.2 km; range = 0.1 – 14 km) from each other.

We obtained two measures of ambient temperature at different spatio-temporal scales. At a fine temporal scale, we obtained half-hourly ambient temperature data from the flux tower at Skukuza (24.9°S, 31.5°E from a Rotronic HygroClip2 Temp/RH probe mounted at 16 m height; South African National Parks) over the study period. Ambient temperature data from the Skukuza flux tower (n = 52,608) ranged from 5.6 °C – 39.3°C in the dry season and 4.2 °C – 36.9 °C in the wet season (seasons defined as per Birkett et al. 2012); daily means ± SD were 21.9 ± 5.4 °C and 21.5 ± 5.2 °C in the dry and wet seasons respectively.

At the coarse landscape-scale, we obtained surface reflectance satellite images of the study area taken in the low-gain thermal infrared range (Band 6; wavelength 10.4 – 12.5 μm; units: Kelvin, converted to degree Celsius) by the Thematic Mapper sensor onboard LANDSAT-5 over the study period (US Geological Service; [Schmidt *et al.* 2013](https://www.zotero.org/google-docs/?cz1J1F)). These remote sensing data were obtained and handled at a resolution of 30m using Google Earth Engine [(Gorelick *et al.* 2017)](https://www.zotero.org/google-docs/?r3WgzM). As our study area is covered by three separate LANDSAT-5 scenes, we obtained a variable number (minimum = 8) of surface reflectance thermal snapshots at each point from LANDSAT-5 over the study period with < 10% cloud cover. We created a spatial composite in Google Earth Engine, and then averaged those at each position; the resulting two-year-mean raster comprised 15,249,291 data points covering the study area. Because LANDSAT-5 crossed the study area between approximately 08h30 – 09h00, the data represent only the diurnal thermal landscape (temperature range: 19.4 °C – 33.8 °C).

## Collar temperature as a measure of the thermal landscape

We tested whether collar temperatures capture variation in the thermal landscape as experienced by elephants at two spatio-temporal scales. At a fine temporal scale, we tested the relationship between collar temperature data with ambient temperature data from the Skukuza flux tower. For this, we collated all elephant positions that were within a 10 km radius of the Skukuza flux tower between 2006 – 2011 (1,706 days; 3 elephants, n = 7,672 in dry season, 21,181 in wet season; See Supplement 1 for more details). For each hour of day, we constructed a LMM with collar temperature as the response variable, ambient temperature from the flux tower and season as fixed effects, and elephant identity as the random effect.

We then created Bland-Altman limits of agreement plots [(Bland and Altman 1986)](https://www.zotero.org/google-docs/?YUr99l), with modifications suitable to repeated measures (Myles and Cui 2007) to examine deviations of collar temperature from the ambient temperature recorded by the flux tower. The modification consisted of deriving the limits of agreement as the mean ± standard normal deviate [(1.96) * standard deviation attributable to elephant identity] from the LMM above. This was also done for each hour separately We took the average of the standard deviation due to elephant identity over each hour to obtain general limits of agreement for a Bland-Altman plot for this data.

At the large spatial scale, we used a linear mixed model to test whether elephant collar temperature was influenced by the following environmental variables: LANDSAT-5 temperature at that location, percent woody cover, and season, with elephant identity as a random effect. We then tested the significance of each fixed effect using a Type II Wald chi-squared test. Since LANDSAT-5 provides data only during the morning, we restricted this analysis to only using collar temperature data between 08h00 and 10h00 each day (n = 35,135).

## Elephant movement in relation to temperature, water, and habitat features

To test whether collar temperature was a significant predictor of elephant movement, we used a generalised additive mixed effects model (GAMM) on the speed of movement (km/h). The GAMM also included season as a categorical fixed effect, density of woody vegetation as a continuous fixed effect, and elephant identity as a random effect. We did not include distance to water as a predictor variable in this analysis because that parameter would not distinguish between the movement towards or away from water. We also did not include time of day in the analysis because it is strongly correlated with collar temperature (see Figure 3a).

To understand how elephants are distributed relative to water sources we compared actual locations of elephants to 200,000 random points in the landscape in each season using a Kolmogorov-Smirnov test. We then identified GPS positions at which elephants entered and exited a 200 m buffer zone around water sources. We used a 200 m buffer (~ mean step length for elephant is 195 m in 30 min) to capture visits to water that may have occurred between successive GPS position fixes. We grouped each individual’s positions into a set of track segments as follows: Each segment began with the first location when the elephant exited the 200 m buffer around the water source (*pt0*, Fig. 2), and ended when the elephant re-entered a 200 m buffer (at the same or different water source; *ptn*, Fig. 2). We further identified consecutive GPS positions within the 200 m buffer and classified those as residence at water (*ptw*, Fig. 2). The last position of each segment could either be followed by residence at water, or by the first position of the next segment. Positions were not duplicated between segments and residence at water, i.e., a segment end point *ptn* was never classified as a residence at water point *ptw*.

We calculated the linear distance (hereafter segment displacement) between the start and end positions of a segment (*D*, Fig. 2). Next, we computed the actual distance moved along each segment *dij* (hereafter, segment distance *d*) as the sum of the steplengths (, Fig. 2), i.e., the cumulative distances between successive points along a segment (*ptxij* to *ptx+1ij*). We also calculated the time difference between the start and end positions of a segment as the segment duration. To standardise segments of different durations, we calculated the proportion of the segment completed at each position along the segment, such that the segment start (*pt0* in Fig. 2) had a value of 0, and the segment end (*ptn* in Fig. 2) had a value of 1. We characterised the distance to water, collar temperature, and elephant speed at each position in relation to the proportion of the segment traversed.

We then used a segmentation and clustering method that identifies stationary phases in a time series [(Picard et al., 2007)](https://www.zotero.org/google-docs/?oJauyK) to classify positions in each segment based on the change in distance to water at that position in the segment (see *dw1* and *dw2*, Fig. 2). The algorithm clustered segments into three classes of behavioural states: (1) Movement away from water, represented by successive positive values of change in distance to water *dw*; (2) no change in position relative to a water source, which was expected to be represented by low variance in values of *dw*; and, (3) movement towards water, which would be represented by successively decreasing distances to water, and thus consistent negative values of *dw*. The minimum length criteria required for determining each behavioral state was 5 GPS positions (2.5 hours for data collected at 30-minute intervals). We removed segments of over 120 hour duration from further consideration as these may represent trips to water sources that are unmapped or ephemeral (n = 26,347, 9.3% of data away from water). Each of the three behavioural states described above could recur in a segment so long as the minimum length criterion was met, and the total number of state changes was 4 or fewer (5 possible phases overall; minimum segment duration required = 25 positions or 12.5 hours; maximum allowed duration = 120 hours). We identified a total of 2,835 segments, comprising of 137,106 positions (~ 48% of the raw data) that met the duration criteria required by the stationary-phase based clustering algorithm. From these, we identified points where the behavioural state changed from state 2 (no change relative to water) to state 3 (movement towards water). We used a LMM to determine whether collar temperature and season influenced when elephants begin to move towards water (i.e. “start seeking water”, as defined by a state change from 2 to 3), with elephant identity as a random effect.

We used the R statistical environment [(R Core Team, 2017)](https://www.zotero.org/google-docs/?xCbQQI) for all analyses, and, specifically, the *lme4*, *mgcv, segclust2d, move,* and *sf* packages to implement LMM, GAMM, stationary phase classification, and general movement and spatial data analyses respectively [(Bates et al., 2015; Kranstauber and Smolla, 2016; Patin et al., 2018; Pebesma, 2018; Wood, 2013)](https://www.zotero.org/google-docs/?hSgSBz). Fig. 1 was generated in QGIS 3.2 [(QGIS Development Team, 2018)](https://www.zotero.org/google-docs/?7K27ra), Fig. 2 was generated in Inkscape 0.92.3, and the remaining figures were generated in R.

**Ethical statement**

Ethics approval for the capture, handling and collaring of elephants was obtained from the University of KwaZulu-Natal Animal Ethics Committee (Ref: 009/10/Animal). This project was also approved by the South African National Parks (Ref: SLOR660).

# Results

## General elephant movement

Over the two-year study period, collared elephants travelled on average 7.4 (SD = 1.8 km) and 7.9 (SD = 1.8) km each day in the dry and wet seasons respectively (LMM estimate = 603.8, t-value = 7.4, Wald II chi-square test Χ2 = 55.3, p < 0.01, with individual elephant variation explaining only 4% of the variance).

## Collar temperatures as a measure of the thermal landscape

Collar temperatures were well predicted by ambient temperatures at both the fine temporal scale and large spatial scale. At the fine temporal scale, collar temperatures from elephant positions ≤ 10 km away from the Skukuza flux tower were well predicted by hour-matched ambient temperatures from the flux tower (LMM estimate = 0.69; t-value = 121.8; Wald II chi-square test Χ2 = 14,837, p < 0.01) and by season (estimate = 0.78; t-value = 15.6; Wald II chi-square test Χ2 = 243.2, p < 0.01; Fig. 3a,b). Of the random effects, elephant identity explained 6.9% of the variance, while hour of day explained 14.2%; the residual variance was 21.4%.

Elephant identity and hour of day as random effects contributed a standard deviation of 5.3°C which, after multiplication by the standard normal deviate (1.96), was used as the range of agreement between the two temperature measures (Fig. 3c for Bland-Altman plot). We further found that the mean of the two temperature measures modelled as a thin-plate spline smoothed term was a significant predictor of the difference between the ambient and collar temperatures in each season (GAM, p < 0.01, adjusted *R2* = 0.75). The GAM fits are increasing curves over the range 15 °C – 35 °C, indicating that the correspondence between collar temperature and flux tower temperature is best at lower temperatures, and decreases at higher temperatures (Fig. 3c; *cf.* Fig. 3a, Supplementary Fig. 1).

At the large spatial scale, daytime collar temperatures were also well predicted by the two-year mean LANDSAT-5 temperature (LMM estimate = 0.9, t-value = 4.2; Wald II chi-square test Χ2  = 17.9, p < 0.01) and season (LMM estimate = 0.3, t-value = 6.0; Wald II chi-square test Χ2 = 36.3, p < 0.01). Percent woody cover was also a predictor of collar temperature at this scale (LMM estimate = 0.01, t-value = 2.2; Wald II chi-square test Χ2 = 5.0, p = 0.03).

Overall, we conclude that collar temperature captures variation in environmental temperature at the spatio-temporal scale of interest, and may be used as a reliable indicator of the variation in thermal landscape as experienced by elephants in the study area.

## Elephant movement in relation to temperature, water, and other habitat features

Based on data from all collared elephants over the two year study period, we found that collar temperature was a significant predictor of speed (GAMM F = 4,544, p < 0.01, Fig. 4a). Elephants moved faster in the wet season (0.4 ± 0.5 km/h SD) than the dry season (0.4 ± 0.5 km/h SD, GAMM estimate = 15.6, t-value = 17.8, p < 0.01). The speed of elephant movement was also lower in denser woodlands (GAMM estimate = -1.6, t-value = -47, p < 0.01, Fig. 4b).

Elephants were distributed closer to water than would be expected by chance (Kolmogorov-Smirnov test; dry season D = 0.09, p < 0.01, wet season D = 0.08, p < 0.01). Collared elephants were on average 1.5 km (range: 0 – 8.6 km) and 0.9 km (range: 0 – 5.9 km) from the nearest water source in the dry and wet seasons respectively (LMM estimate = -653.8, t-value = -147.9, Wald II chi-square test Χ2 = 21,886, p < 0.01). Elephant locations were ≤ 200 m from a water source 21.6% of the time (n = 61,252 positions; 19.6% of dry season points; 23.5% of wet season points). From these positions, elephants spent on average 2.6 hours (± 2.7 SD) in continuous residence at water in the wet season and 3.5 hours (± 4.1 SD) at water in the dry season (LMM estimate = -0.86, t-value = -11.0, Wald II chi-square test Χ2 = 121.4; p < 0.01). Collar temperatures were on average 29.5 °C (± 6.4 SD) while elephants were at a water source, with an effect of season (dry season mean = 29.8 °C, wet season mean = 29.2 °C; LMM estimate = -0.4, t-value = -7.5, Wald II chi-square test Χ2 = 56.8; p < 0.01) and hour of day (LMM estimate = 0.1, t-value = 13.9, Wald II chi-square test Χ2 = 192.4; p < 0.01).

Shuttling behaviour to water sources in the dry season typically began at 14:00 (± 5 h SD), when elephants left water and ended at 11:00 (± 5 h SD) when they returned to water. In the wet season, this segment of movement typically began at 13:00 (± 5 h SD) and ended at 10:00 (± 5 h SD). While moving along these segments, elephants travelled 12 km ± 8.5 km over 31 ± 20 hours in the dry season, and 10 km ± 7 km over 27 ± 7 hours in the wet season (all values are mean ± SD; see *dij* in Fig. 2). In 92 % of segments (n = 2,570 segments), the segment displacement (*D*, Fig. 2) was ≥ 500 m, with a small seasonal difference (mean = 3.8 km ± 3.7 km SD in the dry season, 3.6 km ± 3.5 km in the wet season; LMM estimate = -273.9, t-value = -2, Wald II chi-square test Χ2 = 4.2; p = 0.04). Segment displacement positively correlated with segment distance travelled in both the dry and wet seasons (t-value = 29.6; Wald II chi-square test Χ2 = 875.2; p < 0.001; Fig. 5).

Elephants moving along segments travelled at most a distance of 2.6 km (±1.2 SD; range = 0.4 – 6.9 km) and 1.9 km (± 0.9 SD; range = 0.4 – 6 km) from the nearest water source in the dry and wet seasons respectively (*dw* inFig. 2; Fig. 6a; LMM estimate = -0.5, t-value = -88, Wald II chi-square test Χ2 = 7886.2; p = < 0.01). Elephants moved at an average speed of 0.4 km/h (± 0.2 SD; range = 0.1 – 1.5 km/h) along segments, with only minor seasonal differences (Fig. 6b; LMM estimate = 0.01, t-value = 3.8, Wald II chi-square test Χ2 = 14.4; p < 0.01). Notably, however, elephant speed was highest in the initial (mean ± SD = 0.6 ± 0.6 km/h) and final (mean ± SD = 0.8 ± 0.8 km/h) tenth of each segment, and lowest at the segment midpoint (mean ± SD = 0.3 ± 0.4 km/h); this represents a slowing down to 46% of initial speed (approximately half as fast) between the segment start and midpoint, and then a speeding up to 137% (around 1.5 times faster) of initial speed at the segment end (Fig. 6b; LMM estimate = 0.1, t-value = 52.3, Wald II chi-square test Χ2 = 2738.6; p < 0.01). Collar temperature at the beginning of the segment, as elephants were leaving water, was 29.6 °C (± 6.1 SD), dropping to a mean of 26.0 °C (SD = 6.22) at segment midpoints, and rising to 30.2 °C (± 6.3 SD) at segment endpoints when elephant returned to water (Fig. 6c; LMM estimate = 1.1, t-value = 21.1, Wald II chi-square test Χ2 = 442.9; p < 0.01). Seasonal differences in collar temperature were detected (LMM estimate = -0.2, t-value = -5.7, Wald II chi-square test Χ2 = 32.1; p < 0.01) but were within the sensitivity of the loggers (1 °C).

From the stationary-phase based clustering algorithm analysis, we identified 2,111 state-change points where elephants began to move towards water (n = 1,003 in dry season; 1,108 in wet season). Although elephants began moving towards water at a higher temperature in the dry season than the wet season, this difference was small, with the dry season state change mean only 1 °C higher than the wet season mean (dry season mean ± SD = 26 °C ± 6.4 °C, wet season mean = 25 °C ± 6.1 °C; LMM: t-value = -4.1, Wald II Χ2 = 16.7, p < 0.01).

# Discussion

Heat dissipation is a major concern for large mammals, especially for mega-herbivores such as the savanna elephant [(Weissenböck et al., 2012; Williams, 1990; Wright and Luck, 1984)](https://www.zotero.org/google-docs/?RCi9w5). Here, we show that temperature and water-dependency are strong drivers of the movement of wild free-ranging savanna elephants across large spatio-temporal scales. In KNP, we find that elephants moved faster at higher temperatures. This is a counter-intuitive result, since elephants, like other savanna dwelling herbivores, are expected to reduce metabolic heat generation by resting during the hotter parts of the day [(Kinahan et al., 2007a; Leggett, 2010; Mole et al., 2016)](https://www.zotero.org/google-docs/?GtY3qt). If they have to move, they are expected to move slowly, which would generate metabolic heat at a lower rate [(Rowe et al., 2013)](https://www.zotero.org/google-docs/?pWmMkY). Importantly, the high rates of movement of elephants in KNP were directed towards a water source, such that they moved fastest when approaching and leaving water, similar to that seen in elephants in Hwange National Park, Zimbabwe (Chamaillé-Jammes *et al.* 2013). Elephants in KNP were also closest to water at hotter times of the day (similar to Purdon and van Aarde 2017), contrary to what is seen in other regions of southern Africa (Valeix *et al.* 2007; Loarie *et al.* 2009).

In general, elephants in KNP travelled 7 – 8 km per day, with very low seasonal differences. This is also unexpected, since savanna elephants in the broader southern African region are constrained around water holes during the dry season (“dry season bottleneck”: [(Loarie et al., 2009; Owen-Smith, 1988; Young et al., 2009)](https://www.zotero.org/google-docs/?J8BgQ6), and only forage farther afield at the onset of the wet season (Birkett *et al.* 2012). However, in the southern region of KNP, the density of water holes and surface water is high, and, thus, accessible to elephants throughout the year. We find that speed of movement was marginally faster in the wet season compared to the dry season and matches expectations from earlier studies (Birkett *et al.* 2012; Chamaillé-Jammes *et al.* 2013). Although they are moving slightly faster in the wet season, likely because they are grazing more than browsing [(Codron et al., 2006)](https://www.zotero.org/google-docs/?aqz2vC), the total distance moved by elephants is similar across seasons. Elephants also moved slower in more densely wooded habitats, irrespective of temperature, likely while foraging or seeking shade (Kinahan *et al.* 2007a).

## The importance of accessing water

The use of various thermoregulatory strategies, such as heat sinks, thermal windows, ear flapping, shade seeking, and dust bathing behaviour, are well recognised for elephants (Wright 1984; Williams 1990; Kinahan *et al.* 2007b; Weissenböck *et al.* 2010; Myhrvold *et al.* 2012; Dunkin *et al.* 2013). Perhaps the most important strategy, however, is through evaporative cooling, especially since cutaneous water loss increases with ambient temperature (Dunkin *et al.* 2013). Thus, heat dissipation through evaporative cooling is more important than water conservation (Dunkin *et al.* 2013). In hot, water-scarce habitats within the range of savanna elephant, this thermoregulatory mechanism is expected to result in high daily water debt. Therefore, elephants should anchor their movement strategies to water sources (Dunkin *et al.* 2013). We find that elephants in KNP are rarely more than 1.5 km away from water, and spend approximately 22% of the time close to a water source, with longer residence at water during the dry season compared to the wet season. Their movement away from water shows a distinct cyclical pattern in all seasons, with a return to water peaking in frequency at a 10 – 30 hour periodicity (see also Chamaillé-Jammes *et al.* 2013). During this shuttling, they rarely returned to within 0.5 km of the same water source. Furthermore, the distance that elephants moved between water sources was positively correlated to the total distance moved, indicating that elephants show low fidelity to water sources in KNP, unlike in other southern African countries (Loarie *et al.* 2009; Valls-Fox 2015). While shuttling between water visits, elephants moved farther away from water sources and travelled for longer durations in the dry season compared to the wet, although there were marginal differences in the total distance they travelled along the route, or where they returned to. This is again in contrast to that seen in other regions, where elephants tend to move less and have greater site fidelity in the dry season than in the wet season (Loarie *et al.* 2009).

Water is required for thermoregulatory reasons and for maintaining osmoregulation. However, access to water has costs in terms of higher competition and predation or poaching risk [(Rashidi et al., 2016; Valeix et al., 2008, 2009a)](https://www.zotero.org/google-docs/?6D7Jvp). In areas with high poaching risk or human activity, elephants use water sources at night to reduce the risk of encountering humans. On the other hand, predation risk at waterholes, especially from lions, typically peaks towards the cooler, night-time hours [(Valeix et al., 2010)](https://www.zotero.org/google-docs/?exgf7c). Therefore animals looking to reduce predation risk should access water during the day (Valeix *et al.* 2009). However, animals generally avoid waterholes at the hottest time of the day due to the lack of cover (“sacrifice area”: [(Brits et al., 2002)](https://www.zotero.org/google-docs/?AwJjYY)) which can induce thermal overloading. Indeed, herbivores across a range of body sizes move less and find shade during the hottest time of day [(Aublet et al., 2009; Hetem et al., 2007, 2012; van Beest et al., 2012; Walsberg, 2000)](https://www.zotero.org/google-docs/?QRAcgY). In KNP, where water is easily accessible and the risk of poaching is low, elephants use short, high-speed bursts of movement to get to water at hotter times of the day. This strategy not only provides the benefit of predation risk avoidance, but also allows them to hydrate and immediately cool down. The advantage of never being too far from water is that elephants can benefit from both direct (evaporation) and indirect (reducing water debt from cutaneous evaporative water loss) cooling, since water is the fastest way for large herbivores to lose heat (Dunkin *et al.* 2013). By shuttling to water in this way, elephants can trade-off a number of ecological and physiological drivers, with physiology in the form of thermoregulation as an important determinant of movement at this spatio-temporal scale.

## Using collar-mounted temperature sensors to generate a dynamic thermal landscape

The use of collar-mounted temperature sensors allowed us to capture the relative differences in the thermal landscape at the scale of animal movement decisions. Although the temperature recorded from these instruments is always higher than the ambient temperature (especially at higher ambient temperatures) because of the heat generated by the GPS circuitry as well as the animal, we show that the collar-mounted temperature data are still well correlated with ambient temperatures across space and time (as validated from both precise as well as extensive environmental data, even with the variation across seasons, time of day and percent woody cover). We recognise that a more accurate measure of both ambient temperature and heat incidence can be derived from either distributing a large number of temperature sensors in the landscape [(Kinahan et al., 2007b)](https://www.zotero.org/google-docs/?HqlY5i) or from animal-mounted black-globe sensors (Hetem *et* *al.* 2007), or both [(Shrestha et al., 2012, 2014)](https://www.zotero.org/google-docs/?qLdSWo). However, the former is logistically challenging to deploy at the large spatial scales required to capture temperature differences across habitat features. The latter is suitable only for animals that are unlikely to damage the delicate instruments. Our approach here, therefore, uses an instrument that is now easily included in most commercial GPS tracking collars, thereby enabling the examination of movement strategies as a function of relative ambient temperature conditions. We do caution against using such collar mounted sensor data to make inferences about the actual ambient, or the animal’s body temperature.

## The need for water to thermoregulate has management implications

The incorporation of physiological factors into understanding animal ranging and distribution is now being highlighted as essential (Dunkin *et al.* 2013; Jachowski *et al.* 2013; Hetem *et al.* 2014). As large mammals are increasingly restricted to areas smaller than their natural home range [(Di Minin et al., 2016; Packer et al. 2013)](https://www.zotero.org/google-docs/?vFH9Zk), both the resources they require and the impact that they have on habitats becomes more intensive [(Kerley et al., 2008)](https://www.zotero.org/google-docs/?mXeHng). Thus, more comprehensive management planning, or more intensive management intervention, such as placement of artificial waterholes (*cf.* [Hilbers et al., 2015; Mwakiwa et al., 2013)](https://www.zotero.org/google-docs/?AtR9r6) or food provisioning, can be necessary. Conventionally, managers only consider the ecological basis of such interventions, such as edge effects from boundaries [(Laurance, 2000; Vanak et al., 2010)](https://www.zotero.org/google-docs/?zSAENj) or the piosphere effect [(Chamaillé-Jammes et al., 2009)](https://www.zotero.org/google-docs/?3UvkOH). Managers also consider the importance of a “landscape of fear” [(Cromsigt et al., 2013; Laundré et al., 2001)](https://www.zotero.org/google-docs/?pfYEpL), and the potential use of this for achieving spatial heterogeneity in elephant distribution and their impacts on vegetation [(SANParks, 2006)](https://www.zotero.org/google-docs/?EVz7el). Here, we have demonstrated that the importance of facultative responses by elephants, which includes dependence on water, underpins their spatial decisions at the daily scale. Perhaps a physiologically based “landscape of thermal stress” may be a more important determinant of space use for a megaherbivore with low predation risk than the “landscape of fear”.

Considering animal movement from a physiological point of view could change the perspective of managers, and, therefore, the basis of their planning and interventions. For example, elephants are known to over-exploit vegetation around water sources (Chamaillé-Jammes *et al.* 2009), and, thus, managers close artificial water holes to reduce impact. However, water and water-points could be important limiting factors from a physiological rather than ecological perspective. We show that elephants are not site-faithful to water sources in KNP, where currently poaching for elephants is (still) minimal, and, thus, the removal of waterpoints in this reserve could have a greater impact on elephant biology, rather than the intended reduction of elephant-induced impact on vegetation. Reduced access to water may put more thermal stress on elephants, requiring them to walk farther and faster to water, and therefore increase their risk of mortality, especially in times of drought (e.g. [Woolley *et al.* 2008)](https://www.zotero.org/google-docs/?gqE2Id). Such incorporation of both the ecological and physiological bases of animal movement strategies is fundamental to sustainable planning in the longer term, and can guide management interventions.

# Conflict of Interest

*The authors declare that the research was conducted in the absence of any commercial or financial relationships that could be construed as a potential conflict of interest*.

# Author Contributions

MT, ATV and RS designed the study and collected the primary data. PRG analysed the data and generated the figures. MT, PRG, and ATV wrote the manuscript with inputs and edits from HHTP and RS.

# Funding

This work is based on the research supported in part by the National Research Foundation of South Africa (Grant Numbers 103659 to ATV, and Grant FA2006032300024 to RS), Amarula Trust funding to RS, University of Kwazulu-Natal funding to RS, Wageningen University funding to HHTP, Department of Science and Technology of India (FIST) to MT, Department of Biotechnology (DBT-IISC partnership program) to MT.

# Acknowledgments

We thank SANParks for providing weather data from the Skukuza flux tower, and for providing shapefiles of geographic features of Kruger NP. We also thank Markus Hofmeyer and the SANParks veterinary team for the collaring of elephants.

# Data Availability Statement

The datasets analyzed for this study can be found on Movebank [**http://www.movebank.org/**](http://www.movebank.org/).

# Figure legends

## Figure 1

Fig. 1: Study area (red circle, inset) in Kruger National Park (KNP), South Africa, showing: Park boundary (grey line), seasonal and perennial rivers (solid blue lines), open waterholes (blue circles), location of the Skukuza flux tower (star) and positions of 14 elephants over 2 years between August 2007 – 2009 (red points). Only a subset of elephant positions (noon and midnight) are shown for better visibility (red points).

## Figure 2

Fig. 2: Schematic of elephant track segments between water points. The positions of elephants (black squares, denoted by *ptx*) from GPS transmitters on collars within 200m (green area) of a water source (river: blue rectangle, waterhole: blue circle) were identified as visits to water. For each individual elephant *i*, we identified track segments *j* (solid lines, denoted segij) as the path joining all positions chronologically between successive departures from and arrivals at water points. Each segment began as the elephant departed the 200 m zone around water (green rhombi, *pt0*), and ended at the position where the elephant arrived within a 200 m zone around water (orange circle, denoted by *ptn*). Positions at which elephants were continuously within 200 m of a water source (black square, denoted by *ptw*) are joined by a dashed line, and were not included in the characterisation of segments away from water. We calculated the time-difference between each segment’s start and end points as the segment time (*tseg*), and identified the segment’s midpoint (purple triangle, denoted *pt50*) as the elephant position when half the segment time had elapsed (*tseg/2*).

We computed the distance travelled between successive positions (*ptx → ptx+1*) in a segment as the steplength (denoted by *v*), and the sum of all *v* in a segment as the distance travelled along the segment (segment distance, denoted *dij*). We calculated the linear distance (segment displacement, denoted *D*) between each segment’s start and end points. Finally, we obtained the linear distance from each elephant position to the nearest water source (denoted *dw*), the relative change in distance to water at each position (*Δdw = dw2 – dw1*), and the collar temperature at each position (*Tx*).

## Figure 3

Fig. 3: (a) Mean collar temperature (solid lines) and measured ambient temperature from Skukuza flux tower (dashed lines) at each hour of day in each season (dry: red lines, wet: blue lines) over the study period. 95% confidence intervals (CI) about each line are shaded. (b) Correlation between mean collar temperature from elephants within 10 km of the Skukuza flux tower (from n = 3 elephants) and time-matched ambient temperatures measured by the flux tower in each season (dry: red circles, wet: blue triangles). The dashed line denotes the line of identity where collar temperature equals ambient temperature. Bars represent 95% CI at each point. (c) Bland-Altman limits of agreement plot comparing collar temperatures and ambient temperatures from the Skukuza flux tower, accounting for repeated measures of individual elephants and hour of day (n = 28,853 total comparisons). The bias between the two measures at each mean temperature is marked by symbols coloured by season (dry: red circles, wet: blue triangles). The black dashed line marks zero difference between the two measures. The upper and lower limits of agreement are shown as the standard normal deviate (1.96) times the standard deviation due to elephant identity, and are marked by solid blue lines, while the mean difference in measures is marked by the solid red line.

## Figure 4

Fig. 4: Speed of elephant movement in relation to (a) collar temperature (at 2°C intervals) and (b) % woody cover (at 5 unit intervals) in the dry (red circles) and wet season (blue triangles). GAMM fit (lines) and 95% confidence intervals (vertical line ranges and shaded areas) are shown for each season separately.

## Figure 5

Fig. 5: Segment displacement (km) between successive visits to water was positively correlated with the distance travelled along the segment (km). Vertical line ranges show 95% confidence intervals around mean values for the dry season (red circles) and wet season (blue triangles) respectively. The solid black line denotes values where displacement = distance.

## Figure 6

Fig. 6: Elephant movement variables along segments between water points at 10% intervals of the segment stage (measured in time): (a) distance to the nearest water source (km), (b) speed (km/hr), and (c) collar temperature (oC). Points are separated by season (dry = red circles, wet = blue triangles), and connected by lines. 95% confidence intervals around each point are shown (note: CI may be too small to be visible for some points).

#

# References

1. Angilletta MJ. 2012. Thermoregulation in animals. Oxford University Press.
2. Aublet J-F, Festa-Bianchet M, Bergero D, and Bassano B. 2009. Temperature constraints on foraging behaviour of male Alpine ibex (Capra ibex) in summer. *Oecologia* **159**: 237–247.
3. Bastille-Rousseau G, Murray DL, Schaefer JA, *et al.* 2018. Spatial scales of habitat selection decisions: implications for telemetry-based movement modelling. *Ecography Cop* **41**: 437–443.
4. Bates D, Mächler M, Bolker B, and Walker S. 2014. Fitting linear mixed-effects models using lme4. *J Stat Softw* **67**: 1–48.
5. van Beest FM, Moorter B van, and Milner JM. 2012. Temperature-mediated habitat use and selection by a heat-sensitive northern ungulate. *Anim Behav* **84**: 723–735.
6. Bennitt E, Bonyongo MC, and Harris S. 2014. Habitat selection by African buffalo *(Syncerus caffer)* in response to landscape-level fluctuations in water availability on two temporal scales. *PLoS One* **9**: 1–14.
7. Birkett PJ, Vanak AT, Muggeo VMR, *et al.* 2012. Animal perception of seasonal thresholds: Changes in elephant movement in relation to rainfall patterns. *PLoS One* **7**: 1–8.
8. Brits J, Van Rooyen MW, and Van Rooyen N. 2002. Ecological impact of large herbivores on the woody vegetation at selected watering points on the eastern basaltic soils in the Kruger National Park. *Afr J Ecol* **40**: 53–60.
9. Bryce CM, Wilmers CC, and Williams TM. 2017. Energetics and evasion dynamics of large predators and prey: pumas *vs.* hounds. *PeerJ* **5**: e3701.
10. Bucini G, Hanan NP, Boone RB, *et al.* 2010. Woody fractional cover in Kruger National Park, South Africa: remote-sensing-based maps and ecological insights. *Ecosyst Funct Savannas Meas Model Landsc Glob Scales*: 219–238.
11. Buss IO and Estes JA. 1971. The functional significance of movements and positions of the pinnae of the African elephant, *Loxodonta africana*. *J Mammal* **52**: 21–27.
12. Cain JW, Krausman PR, Rosenstock SS, and Turner JC. 2006. Mechanisms of thermoregulation and water balance in desert ungulates. *Wildl Soc Bull 1973-2006* **34**: 570–581.
13. Cain JW, Owen-Smith N, and Macandza VA. 2012. The costs of drinking: comparative water dependency of sable antelope and zebra. *J Zool* **286**: 58–67.
14. Chamaillé-Jammes S, Fritz H, and Madzikanda H. 2009. Piosphere contribution to landscape heterogeneity: A case study of remote-sensed woody cover in a high elephant density landscape. *Ecography Cop* **32**: 871–880.
15. Chamaillé-Jammes S, Mtare G, Makuwe E, and Fritz H. 2013. African elephants adjust speed in response to surface-water constraint on foraging during the dry-season. *PLOS ONE* **8**: e59164.
16. Codron J, Lee-Thorp JA, Sponheimer M, *et al.* 2006. Elephant *(Loxodonta africana)* diets in kruger national park, south africa: Spatial and landscape differences. *J Mammal* **87**: 27–34.
17. Cromsigt JPGM, Kuijper DPJ, Adam M, *et al.* 2013. Hunting for fear: innovating management of human–wildlife conflicts. *J Appl Ecol* **50**: 544–9.
18. Di Minin E, Slotow R, Hunter LTB, *et al.* 2016. Global priorities for national carnivore conservation under land use change. *Sci Rep* **6**: 23814.
19. Dunkin RC, Wilson D, Way N, *et al.* 2013. Climate influences thermal balance and water use in African and Asian elephants: physiology can predict drivers of elephant distribution. *J Exp Biol* **216**: 2939–2952.
20. Fortin D, Fryxell JM, O’Brodovich L, and Frandsen D. 2003. Foraging ecology of bison at the landscape and plant community levels: The applicability of energy maximization principles. *Oecologia* **134**: 219–227.
21. Fuller A, Hetem RS, Maloney SK, and Mitchell D. 2014. Adaptation to heat and water shortage in large, arid-zone mammals. *Physiology* **29**: 159–167.
22. Giavarina D. 2015. Understanding Bland Altman analysis. *Biochem Medica* **25**: 141–51.
23. Giotto N, Gerard JF, Ziv A, *et al.* 2015. Space-use patterns of the asiatic wild ass *(Equus hemionus)*: Complementary insights from displacement, recursion movement and habitat selection analyses. *PLoS One* **10**: 1–21.
24. Gorelick N, Hancher M, Dixon M, *et al.* 2017. Google Earth Engine: Planetary-scale geospatial analysis for everyone. *Remote Sens Env* **202**: 18–27.
25. Guralnick R. 2006. The legacy of past climate and landscape change on species’ current experienced climate and elevation ranges across latitude: a multispecies study utilizing mammals in western North America. *Glob Ecol Biogeogr* **15**: 505–18.
26. Hetem RS, Fuller A, Maloney SK, and Mitchell D. 2014. Responses of large mammals to climate change. *Temperature* **1**: 115–127.
27. Hetem RS, Maartin Strauss W, Heusinkveld BG, *et al.* 2011. Energy advantages of orientation to solar radiation in three African ruminants. *J Therm Biol* **36**: 452–60.
28. Hetem RS, Maloney SK, Fuller A, *et al.* 2007. Validation of a biotelemetric technique, using ambulatory miniature black globe thermometers, to quantify thermoregulatory behaviour in ungulates. *J Exp Zool Part Ecol Genet Physiol* **307**: 342–356.
29. Hetem RS, Strauss WM, Fick LG, *et al.* 2012. Activity re-assignment and microclimate selection of free-living Arabian oryx: Responses that could minimise the effects of climate change on homeostasis? *Zoology* **115**: 411–416.
30. Hilbers JP, Langevelde F van, Prins HHT, *et al.* 2015. Modeling elephant-mediated cascading effects of water point closure. *Ecol Appl* **25**: 402–15.
31. Jachowski DS, Montgomery RA, Slotow R, and Millspaugh JJ. 2013. Unravelling complex associations between physiological state and movement of African elephants (C Franklin, Ed). *Funct Ecol* **27**: 1166–1175.
32. Jachowski DS, Slotow R, and Millspaugh JJ. 2012. Physiological stress and refuge behavior by African elephants (B Fenton, Ed). *PLoS One* **7**: e31818.
33. Johnson CJ, Parker KL, Heard DC, and Gillingham MP. 2002. Movement parameters of ungulates and scale-specific responses to the environment. *J Anim Ecol* **71**: 225–235.
34. Kays R, Crofoot MC, Jetz W, and Wikelski M. 2015. Terrestrial animal tracking as an eye on life and planet. *Science* **348**: aaa2478.
35. Kerley GIH, Landman M, Kruger L, *et al.* 2008. Effects of elephants on ecosystems and biodiversity. In: Elephant Manag. a Sci. Assess. South Africa. Wits University Press.
36. Kinahan AA, Inge-moller R, Bateman PW, *et al.* 2007a. Body temperature daily rhythm adaptations in African savanna elephants *(Loxodonta africana)*. *Physiol Behav* **92**: 560–565.
37. Kinahan AA, Pimm SL, and Aarde RJ van. 2007b. Ambient temperature as a determinant of landscape use in the savanna elephant, Loxodonta africana. *J Therm Biol* **32**: 47–58.
38. Kranstauber B and Smolla M. 2016. move: Visualizing and Analyzing Animal Track Data.
39. Laundré JW, Hernández L, and Altendorf KB. 2001. Wolves, elk, and bison: reestablishing the “landscape of fear” in Yellowstone National Park, U.S.A. *Can J Zool* **79**: 1401–1409.
40. Laurance WF. 2000. Do edge effects occur over large spatial scales? *Trends Ecol Evol* **15**: 134–5.
41. Leggett K. 2010. Daily and hourly movement of male desert-dwelling elephants. *Afr J Ecol* **48**: 197–205.
42. Loarie SR, Aarde RJV, and Pimm SL. 2009. Fences and artificial water affect African savannah elephant movement patterns. *Biol Conserv* **142**: 3086–3098.
43. Mitchell D, Snelling EP, Hetem RS, *et al.* 2018. Revisiting concepts of thermal physiology: Predicting responses of mammals to climate change. *J Anim Ecol* **87**: 956–73.
44. Mole MA, Rodrigues DÁraujo S, Aarde RJ van, *et al.* 2016. Coping with heat: behavioural and physiological responses of savanna elephants in their natural habitat. *Conserv Physiol* **4**: cow044.
45. Mwakiwa E, Boer WF de, Hearne JW, *et al.* 2013. Optimization of wildlife management in a large game reserve through waterpoints manipulation: A bio-economic analysis. *J Environ Manage* **114**: 352–61.
46. Myhrvold CL, Stone HA, and Bou-Zeid E. 2012. What Is the Use of Elephant Hair? (CM Aegerter, Ed). *PLoS One* **7**: e47018.
47. Myles PS and Cui J. 2007. I. Using the Bland–Altman method to measure agreement with repeated measures. *Br J Anaesth* **99**: 309–11.
48. Nathan R, Getz WM, Revilla E, *et al.* 2008. A movement ecology paradigm for unifying organismal movement research. *Proc Natl Acad Sci U S A* **105**: 19052–9.
49. Owen-Smith RN. 1988. Megaherbivores: The Influence of Very Large Body Size on Ecology. Cambridge: Cambridge University Press.
50. Owen-Smith N and Goodall V. 2014. Coping with savanna seasonality: Comparative daily activity patterns of African ungulates as revealed by GPS telemetry. *J Zool* **293**: 181–191.
51. Packer C, Loveridge A, Canney S, *et al.* 2013. Conserving large carnivores: Dollars and fence. *Ecol Lett* **16**: 635–641.
52. Pebesma E. 2018. Simple Features for R: Standardized Support for Spatial Vector Data. *R J* **10**: 439–46.
53. Prins HHT. 1996. Behaviour and ecology of the African buffalo: social inequality and decision making. Chapman and Hall, London.
54. Prins HHT and Langevelde FV. 2008. Assembling a diet from different places. In: Resource Ecology: Spatial and Temporal Dynamics of Foraging. Springer, Dordrecht.
55. Purdon A. 2015. Environmental determinants of the movement patterns of elephants in the Kruger National Park.
56. Purdon A and Aarde RJ van. 2017. Water provisioning in Kruger National Park alters elephant spatial utilisation patterns. *J Arid Env* **141**: 45–51.
57. Rashidi, P, Wang T, Skidmore A, Mehdipoor H, Darvishzadeh R, Ngene S, Vrieling A, and Toxopeus AG. 2016. Elephant poaching risk assessed using spatial and non-spatial Bayesian models. *Ecol. Model.* **338**: 60-68
58. Rowe MF, Bakken GS, Ratliff JJ, and Langman VA. 2013. Heat storage in Asian elephants during submaximal exercise: behavioral regulation of thermoregulatory constraints on activity in endothermic gigantotherms. *J Exp Biol* **216**: 1774–85.
59. SANParks. 2006. Kruger National Park Elephant Management Plan 2012 - 2023.
60. Scantlebury DM, Mills MGL, Wilson RP, *et al.* 2014. Flexible energetics of cheetah hunting strategies provide resistance against kleptoparasitism. *Science* **346**: 79–81.
61. Shrestha AK, Wieren SE van, Langevelde F van, *et al.* 2012. Body temperature variation of South African antelopes in two climatically contrasting environments. *J Therm Biol* **37**: 171–178.
62. Shrestha AK, Wieren SE van, Langevelde F van, *et al.* 2014. Larger antelopes are sensitive to heat stress throughout all seasons but smaller antelopes only during summer in an African semi-arid environment. *Int J Biometeorol* **58**: 41–49.
63. Thaker M, Vanak AT, Owen CR, *et al.* 2011. Minimizing predation risk in a landscape of multiple predators: effects on the spatial distribution of African ungulates. *Ecology* **92**: 398–407.
64. Valeix M, Chamaillé-Jammes S, and Fritz H. 2007. Interference competition and temporal niche shifts: elephants and herbivore communities at waterholes. *Oecologia* **153**: 739–48.
65. Valeix M, Fritz H, Loveridge AJ, *et al.* 2009. Does the risk of encountering lions influence African herbivore behaviour at waterholes? *Behav Ecol Sociobiol* **63**: 1483–1494.
66. Valeix M, Fritz H, Matsika R, *et al.* 2008. The role of water abundance, thermoregulation, perceived predation risk and interference competition in water access by African herbivores. *Afr J Ecol* **46**: 402–410.
67. Valeix M, Loveridge AJ, Davidson Z, *et al.* 2010. How key habitat features influence large terrestrial carnivore movements: Waterholes and African lions in a semi-arid savanna of north-western Zimbabwe. *Landsc Ecol* **25**: 337–351.
68. Valls-Fox H. 2015. To drink or not to drink? The influence of resource availability on elephant foraging and habitat selection in a semi-arid savanna.
69. Vanak AT, Fortin D, Thaker M, *et al.* 2013. Moving to stay in place: Behavioral mechanisms for coexistence of African large carnivores. *Ecology* **94**: 2619–2631.
70. Vanak AT, Thaker M, and Slotow R. 2010. Do fences create an edge-effect on the movement patterns of a highly mobile mega-herbivore? *Biol Conserv* **143**: 2631–2637.
71. Walsberg GE. 2000. Small mammals in hot deserts: Some generalizations revisited. *Bioscience* **50**: 109.
72. Wato YA, Heitkönig IMA, Wieren SE van, *et al.* 2016. Prolonged drought results in starvation of African elephant *(Loxodonta africana)*. *Biol Conserv* **203**: 89–96.
73. Wato YA, Prins HHT, Heitkönig IMA, *et al.* 2018. Movement patterns of African elephants (*Loxodonta africana*) in a semi-arid savanna suggest that they have information on the location of dispersed water sources. *Front Ecol Evol* **6**:167 [fevo.2018.00167](https://www.researchgate.net/deref/https%3A%2F%2Fdoi.org%2F10.3389%2Ffevo.2018.00167).
74. Weissenböck NM, Weiss CM, Schwammer HM, and Kratochvil H. 2010. Thermal windows on the body surface of African elephants *(Loxodonta africana)* studied by infrared thermography. *J Therm Biol* **35**: 182–188.
75. Williams TM. 1990. Heat transfer in elephants: thermal partitioning based on skin temperature profiles. *J Zool* **222**: 235–245.
76. Williams TM. 2004. The cost of foraging by a marine predator, the Weddell seal *Leptonychotes weddellii*: pricing by the stroke. *J Exp Biol* **207**: 973–982.
77. Williams TM, Wolfe L, Davis T, *et al.* 2014. Instantaneous energetics of puma kills reveal advantage of felid sneak attacks. *Sci 80-* **346**: 81 LP – 85.
78. Wood SN. 2013. Generalized Additive Models: An Introduction with R. Chapman and Hall/CRC.
79. Woolley LA, Mackey RL, Page BR, and Slotow R. 2008. Modelling the effect of age-specific mortality on elephant Loxodonta africana populations: Can natural mortality provide regulation? *Oryx* **42**: 49–57.
80. Wright PG. 1984. Why do elephants flap their ears? *South Afr J Zool* **19**: 266–269.
81. Wright CP and Luck CP. 1984. Do elephants need to sweat? *South Afr J Zool* **19**: 270–274.
82. Young KD, Ferreira SM, and Aarde RJV. 2009. Elephant spatial use in wet and dry savannas of southern Africa. *J Zool* **278**: 189–205.
